# Supplementary material
Source: MDPI journal article supplement (https://www.mdpi.com/2079-6412/11/2/198)
Supplement: s1 [file s1]

# Supplementary Materials: Modeling of Poly(methylmethacrylate) Viscous Thin Films by Spin-Coating

Navid Chapman, Mingyu Chapman and William B. Euler \*

**Citation:** Chapman, N.; Chapman, M.; Euler, W.B. Modeling of Poly(methylmethacrylate) Viscous Thin Films by Spin-Coating. *Coatings* **2021**, *11*, 198. <https://doi.org/10.3390/coatings11020198>

Department of Chemistry, Kingston, University of Rhode Island, RI 02881, USA; navid\_chapmanl@uri.edu (N.C.); mingyu\_chapman@uri.edu (M.C.)

\* Correspondence: billeuler@uri.edu

Academic Editor: Bartosz Handke

Received: 18 January 2021

Accepted: 3 February 2021

Published: 9 February 2021

**Publisher's Note:** MDPI stays neutral with regard to jurisdictional claims in published maps and institutional affiliations.

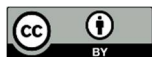

**Copyright:** © 2021 by the authors. Submitted for possible open access publication under the terms and conditions of the Creative Commons Attribution (CC BY) license (<http://creativecommons.org/licenses/by/4.0/>).

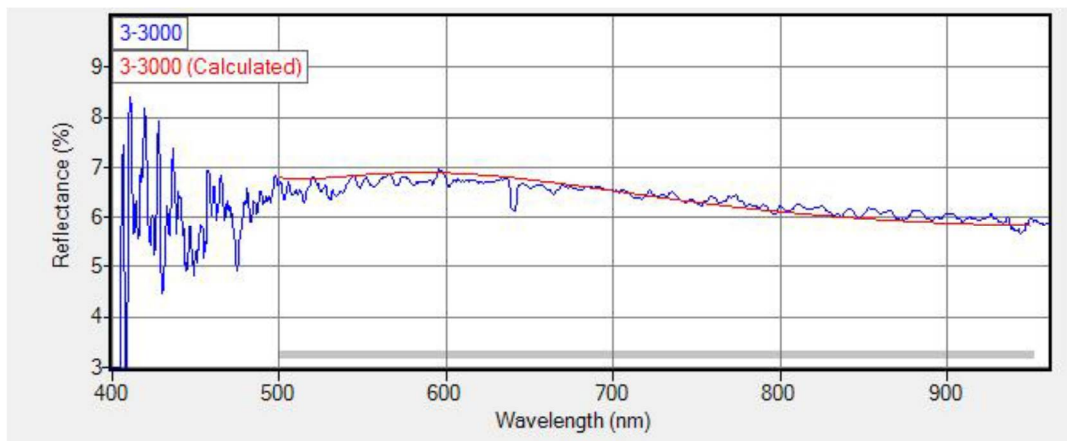

(A)

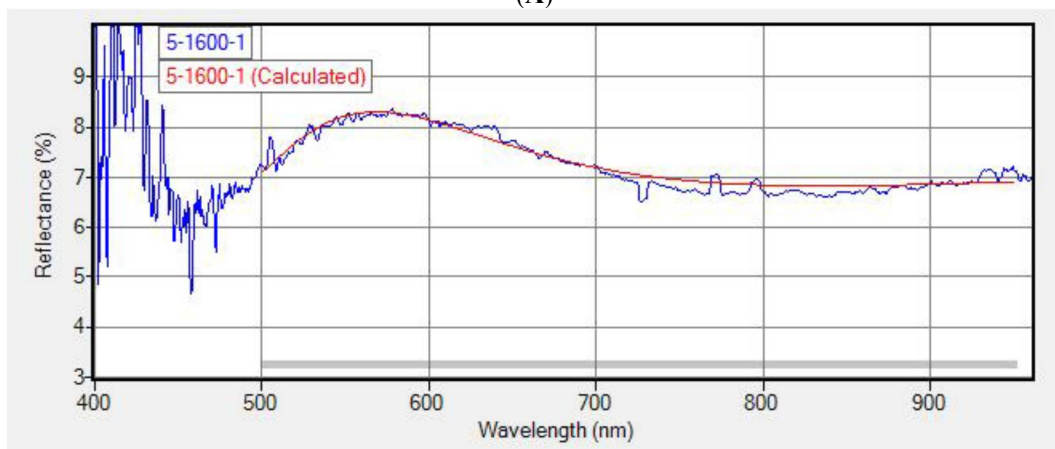

(B)

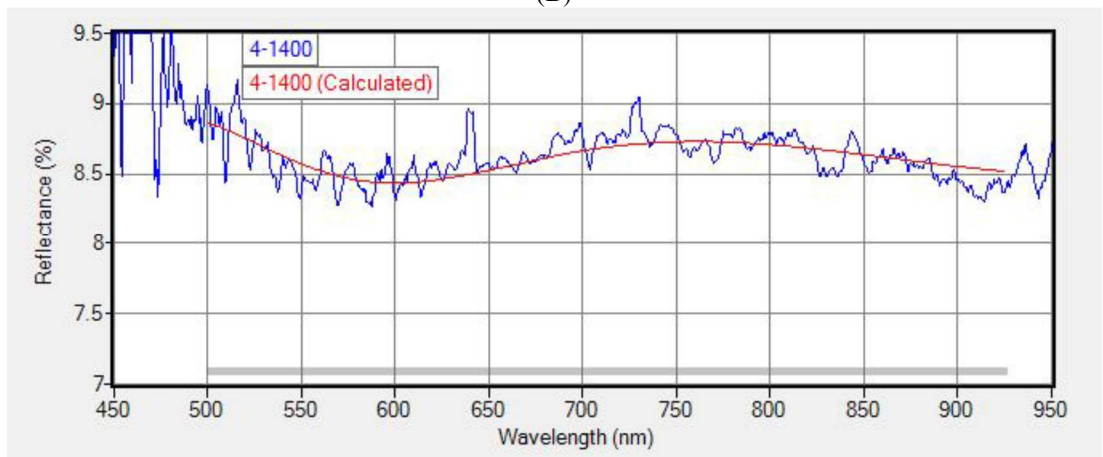

(C)

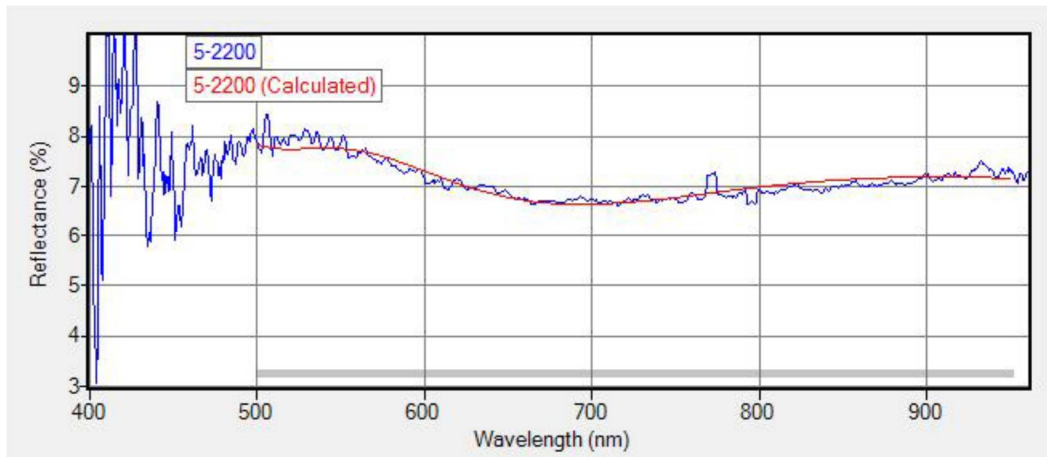

(D)

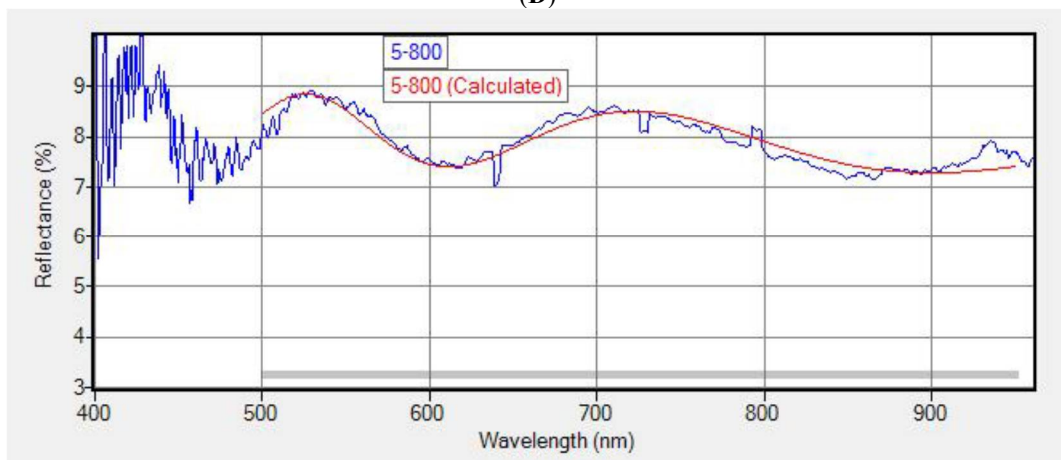

(E)

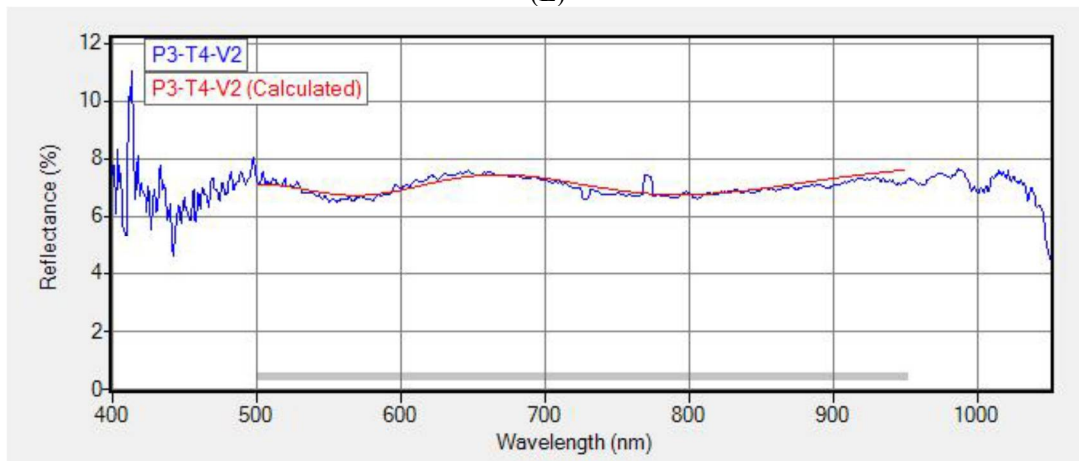

(F)

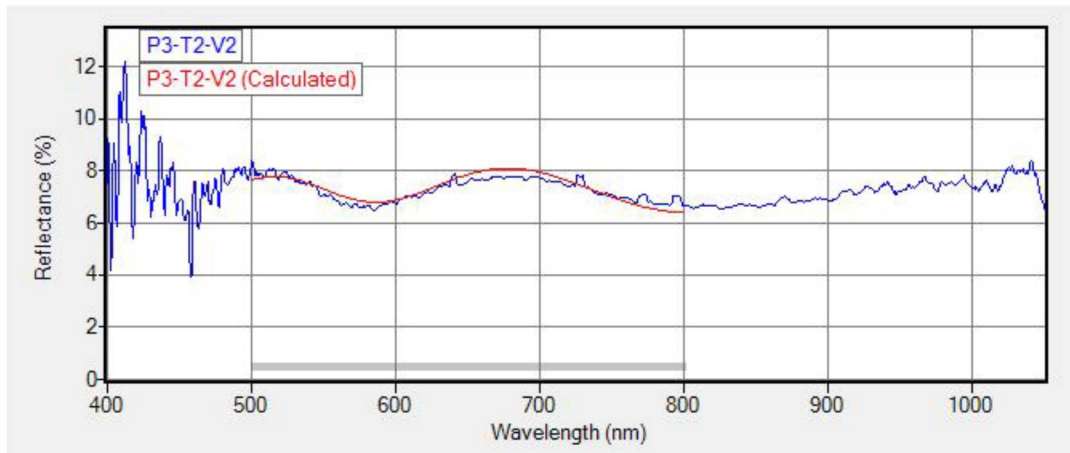

(G)

**Figure S1.** Reflection spectra of PMMA films with fits. **(A):** 168 nm thick PMMA film with fit (red line). The nonuniformity of the fit is  $\pm 19$  nm and the goodness of fit is 0.9444. **(B):** 292 nm thick PMMA film with fit (red line). The nonuniformity of the fit is  $\pm 23$  nm and the goodness of fit is 0.9666. **(C):** 302 nm thick PMMA film with fit (red line). The nonuniformity of the fit is  $\pm 114$  nm and the goodness of fit is 0.9700. **(D):** 443 nm thick PMMA film with fit (red line). The nonuniformity of the fit is  $\pm 69$  nm and the goodness of fit is 0.9538. **(E):** 581 nm thick PMMA film with fit (red line). The nonuniformity of the fit is  $\pm 56$  nm and the goodness of fit is 0.9304. **(F):** 686 nm thick PMMA film with fit (red line). The nonuniformity of the fit is  $\pm 14$  nm and the goodness of fit is 0.9258. **(G):** 722 nm thick PMMA film with fit (red line). The nonuniformity of the fit is  $\pm 29$  nm and the goodness of fit is 0.8792.
